# Supplementary material
Source: PubMed Central journal article supplement (PMC9539991)
Supplement: FSB2-36-0-s001.pdf [file FSB2-36-0-s001.pdf]

## SUPPLEMENTAL MATERIAL 2

### Integrated analysis of the tumor microenvironment using a reconfigurable microfluidic cell culture platform

Nan Sethakorn, Erika Heninger, Matthew T. Breneman, Emma Recchia, Adeline B. Ding, David F. Jarrard, Peiman Hematti, David J. Beebe, and David Kosoff

| <b>T cell Migration Assay</b>                                                                                        |                       |                                 |                                  |
|----------------------------------------------------------------------------------------------------------------------|-----------------------|---------------------------------|----------------------------------|
| <b>Marker (clone)</b>                                                                                                | <b>Fluorochrome</b>   | <b>Purpose</b>                  | <b>Product Specifics</b>         |
| CD4 (RPA-T4)                                                                                                         | Brilliant™ Blue 515   | T cell marker                   | BD Biosciences #564419           |
| CD8 (RPA_T8)                                                                                                         | PE                    | T cell marker                   | BD Biosciences #555367           |
| <b>Flow Cytometry Panel</b>                                                                                          |                       |                                 |                                  |
| <b>Marker (clone)</b>                                                                                                | <b>Fluorochrome</b>   | <b>Purpose</b>                  | <b>Product Specifics</b>         |
| Ghost Dye™ Violet 510                                                                                                | Ex/Em ~405/510 nm     | Dead cell exclusion             | Tonbo Biosciences #13-0870       |
| CD80 (L307.4)                                                                                                        | Brilliant™ Blue 515   | M1 polarization                 | BD Biosciences #565008           |
| CD11b (M1/70)                                                                                                        | Brilliant™ Violet 421 | Myeloid panmarker               | Biolegend #101236                |
| CD200R (OX-108)                                                                                                      | PE                    | M2 polarization                 | Biolegend #392305                |
| CD14 (M5E2)                                                                                                          | APC                   | Monocyte differentiation        | BD Biosciences #555399           |
| Fc Block™ (3070)                                                                                                     | n/a                   | Reduce nonspecific binding      | BD Biosciences #564220           |
| <b>Fluorescent Microscopy Analysis for Apoptosis, Cytotoxicity, Prostate Organoid and Adipogenic Differentiation</b> |                       |                                 |                                  |
| <b>Marker (clone)</b>                                                                                                | <b>fluorochrome</b>   | <b>Purpose</b>                  | <b>Product Specifics</b>         |
| Calcein AM (n/a)                                                                                                     | Ex/Em 495/515 nm      | Viability detection             | Thermo Fisher Scientific #C3099  |
| NucView® 488 (n/a)                                                                                                   | Ex/Em 500/530 nm      | Apoptotic activity detection    | Biotium #30073                   |
| IMAGE-iT™ DEAD Green                                                                                                 | Ex/Em 490/508 nm      | Cell death detection            | Thermo Fisher Scientific #I10291 |
| EpCAM (9C4)                                                                                                          | Alexa 647             | Epithelial cell marker          | Biolegend #324212                |
| Hoechst 33342                                                                                                        | n/a                   | Nuclear stain                   | Life Technologies #H3570         |
| LipidSpot™ 610                                                                                                       | Ex/Em 592/638 nm      | Adipogenic lipid drop detection | Biotium #700-69T                 |

Supplementary Table I. Antibody and Fluorescent Reagent Specifics
